# Supplementary material for: SEC31A-ALK Fusion Gene in Lung Adenocarcinoma
Source: PubMed Central journal article supplement — Cancer Res Treat. 2015 Feb 17;48(1):398–402. doi: 10.4143/crt.2014.254 (PMC4720077; doi:10.4143/crt.2014.254), 2015-02-17
Supplement: crt-2014-254-supple.pdf [file crt-2014-254-supple.pdf]

## Case Report

## Open Access

**SEC31A-ALK Fusion Gene in Lung Adenocarcinoma**

**Ryong Nam Kim**, PhD<sup>1,2</sup>, **Yoon-La Choi**, MD, PhD<sup>3,4,5</sup>, **Mi-Sook Lee**, MD<sup>4,5</sup>, **Maruja E. Lira**, BS<sup>6</sup>, **Mao Mao**, MD, PhD<sup>6a</sup>, **Derrick Mann**, PhD<sup>7</sup>, **Joshua Stahl**, PhD<sup>7</sup>, **Abel Licon**, PhD<sup>7</sup>, **So Jung Choi**, PhD<sup>8</sup>, **Michael Van Vrancken**, MD, MPH<sup>3,9</sup>, **Joungho Han**, PhD<sup>3</sup>, **Iwona Wlodarska**, MD, PhD<sup>10</sup>, **Jhingook Kim**, MD, PhD<sup>8</sup>

<sup>1</sup>Department of Pharmacy, College of Pharmacy, Seoul National University, Seoul, <sup>2</sup>Tumor Microenvironment Global Core Research Center, Seoul National University, Seoul, <sup>3</sup>Department of Pathology, Samsung Medical Center, Sungkyunkwan University School of Medicine, Seoul,

<sup>4</sup>Laboratory of Cancer Genomics and Molecular Pathology, Samsung Biomedical Research Institute, Samsung Medical Center, Seoul,

<sup>5</sup>Samsung Advanced Institute for Health Sciences and Technology, Sungkyunkwan University School of Medicine, Seoul, Korea,

<sup>6</sup>Oncology Research Unit, Pfizer Worldwide Research and Development, San Diego, CA, <sup>7</sup>Enzymatics, Boulder, CO, USA,

<sup>8</sup>Department of Thoracic Surgery, Samsung Medical Center, Sungkyunkwan University School of Medicine, Seoul, Korea,

<sup>9</sup>Department of Pathology, Baylor University Medical Center at Dallas, Dallas, TX, USA,

<sup>10</sup>Department of Human Genetics, KU Leuven, Leuven, Belgium

**Supplementary Data****Table of Contents**

|                             |   |
|-----------------------------|---|
| Supplementary Fig. S1 ..... | 2 |
| Supplementary Fig. S2 ..... | 2 |
| Supplementary Fig. S3 ..... | 3 |

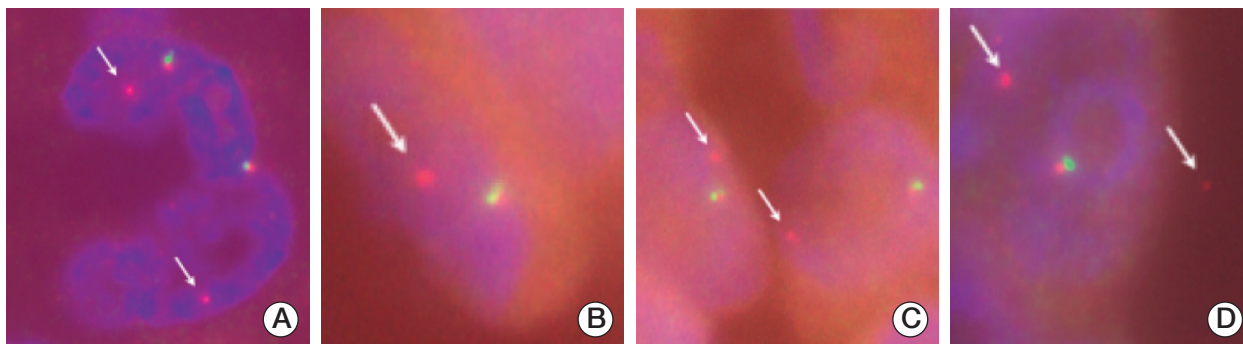

**Supplementary Fig. S1.** (A-D) *SEC31A* break-apart fluorescence *in situ* hybridization assay showing genomic rearrangement of *SEC31A* associated with loss of the 3'-end of *SEC31A* (arrows, 5'-end of *SEC31A*).

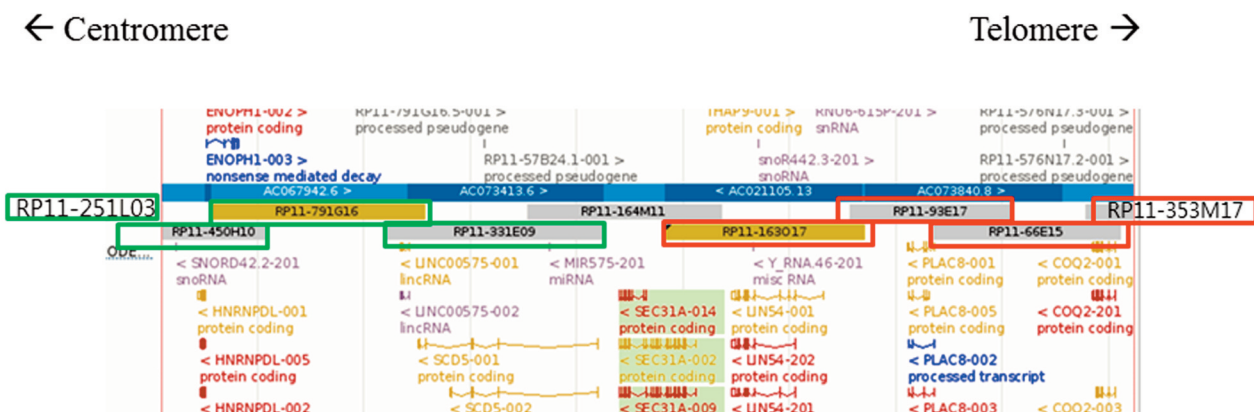

**Supplementary Fig. S2.** Fluorescence *in situ* hybridization (FISH) clones for designing *SEC31A* break-apart FISH assay probes in chromosomal region 4q21.22 in Ensembl genome browser.

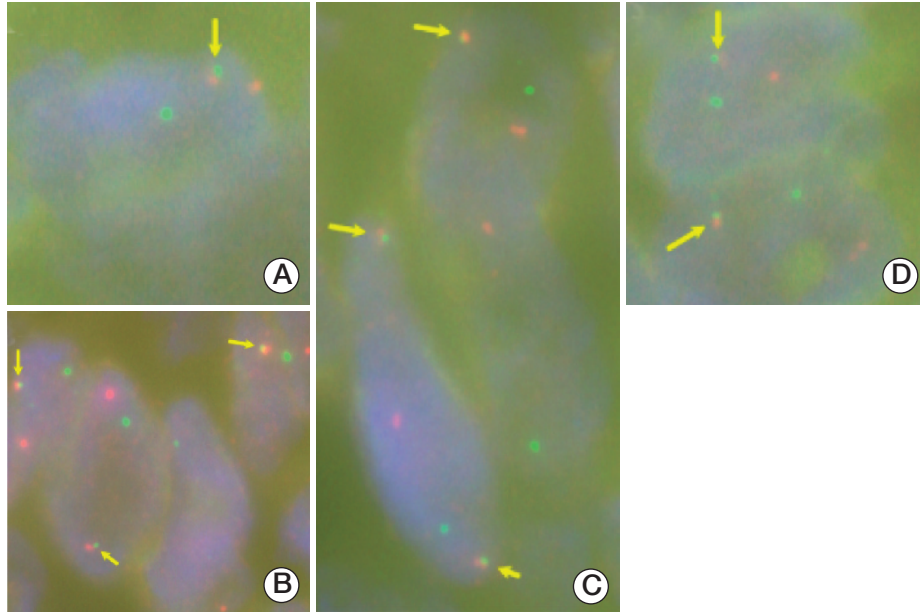

**Supplementary Fig. S3.** Fluorescence *in situ* hybridization assay of *SEC31A-ALK* showing co-localization of the 5'-end of *SEC31A* and the 3'-end of *ALK* (arrows). *ALK*, anaplastic lymphoma kinase.
